# Supplementary material for: Investigating the spatial variation and risk factors of childhood anaemia in four sub-Saharan African countries
Source: PubMed Central journal article supplement (PMC6990548; doi:10.1186/s12889-020-8189-8), 2020-01-29
Supplement: 12889_2020_8189_MOESM1_ESM.pdf [file 12889_2020_8189_MOESM1_ESM.pdf]

**Additional File 1: Investigating the spatial variation and risk factors of childhood anaemia in 4 sub-Saharan African countries**

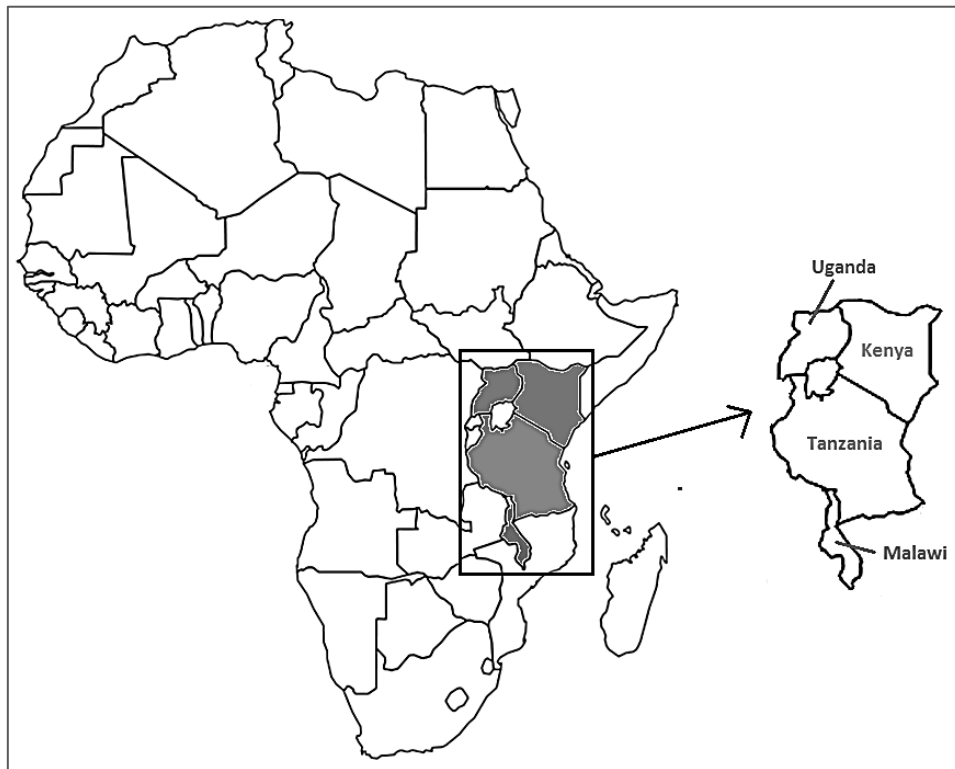

**Figure S1: Location of study areas**

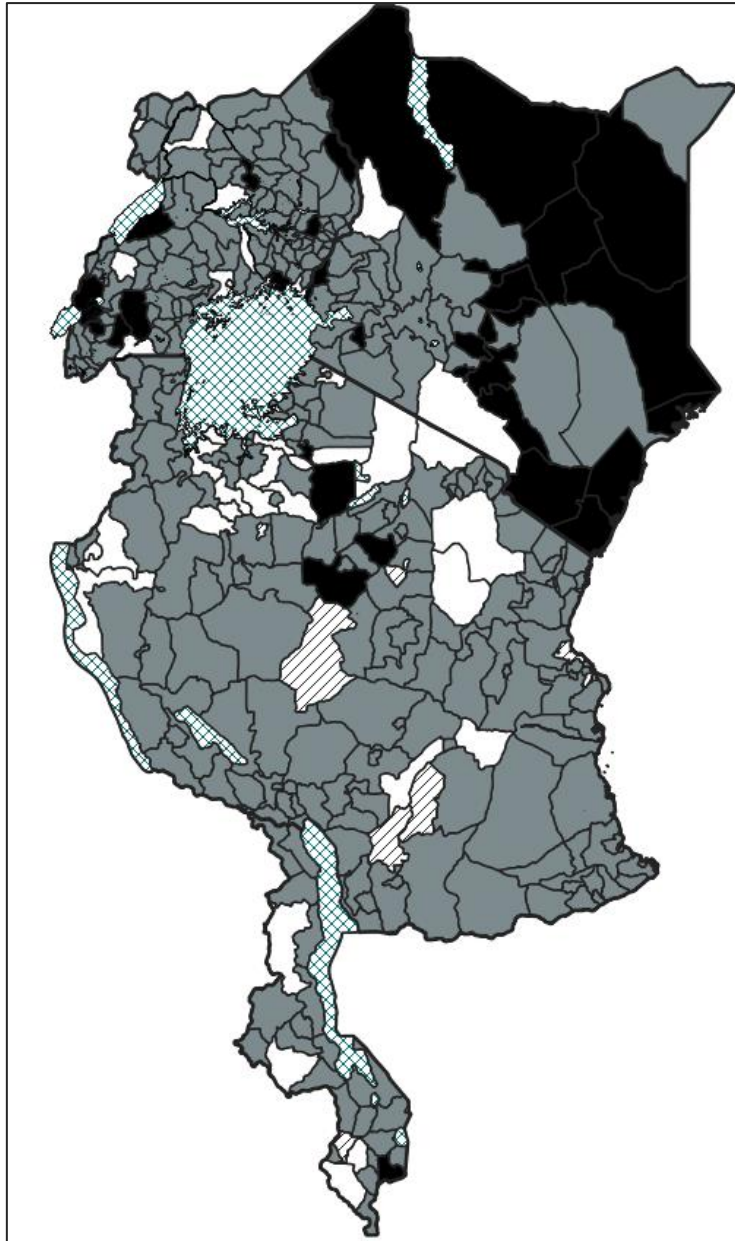

**Figure S2: Significance of the unstructured spatial effect. Black districts – significant negative effect, grey districts - no significance, white districts- significant positive effect (criss-cross pattern indicates waterbodies; diagonal lines indicate districts with no available data).** This figure is based on the results of this study and makes use of shapefiles freely available from the Spatial Data Repository (<https://spatialdata.dhsprogram.com/boundaries>)
