# Supplementary material for: Investigating the spatial variation and risk factors of childhood anaemia in four sub-Saharan African countries
Source: PubMed Central journal article supplement (PMC6990548; doi:10.1186/s12889-020-8189-8), 2020-01-29
Supplement: 12889_2020_8189_MOESM2_ESM.pdf [file 12889_2020_8189_MOESM2_ESM.pdf]

**Table 1:** Sample size (n) and percentage of anaemic children (95% confidence interval) according to the categorical predictors within each country based on sampling weights

| Characteristics                   | Country     |                          |             |                          |             |                          |             |                          | Overall      |                          |  |
|-----------------------------------|-------------|--------------------------|-------------|--------------------------|-------------|--------------------------|-------------|--------------------------|--------------|--------------------------|--|
|                                   | Kenya       |                          | Malawi      |                          | Tanzania    |                          | Uganda      |                          | n            | % Anaemic (95% CI)       |  |
|                                   | n           | % Anaemic (95% CI)       | n           | % Anaemic (95% CI)       | n           | % Anaemic (95% CI)       | n           | % Anaemic (95% CI)       |              |                          |  |
| <i>Gender</i>                     |             |                          |             |                          |             |                          |             |                          |              |                          |  |
| Male                              | 1566        | 38.5 (35.2, 41.2)        | 1256        | 61.1 (57.7, 64.4)        | 4349        | 59.6 (57.8, 61.3)        | 2351        | 53.5 (51.2, 55.9)        | 9522         | 54.8 (53.6, 56.0)        |  |
| Female                            | 1513        | 34.5 (31.8, 37.4)        | 1235        | 62.6 (59.2, 65.9)        | 4299        | 56.0 (54.3, 57.8)        | 2336        | 52.4 (50.1, 54.7)        | 9383         | 52.5 (51.3, 53.7)        |  |
| <i>Malaria</i>                    |             |                          |             |                          |             |                          |             |                          |              |                          |  |
| Positive                          | 277         | 63.4 (57.2, 69.2)        | 906         | 77.7 (73.9, 81.1)        | 1284        | 82.7 (80.2, 85.0)        | 1433        | 75.6 (73.1, 77.9)        | 3900         | 77.6 (76.0, 79.1)        |  |
| Negative                          | 2802        | 33.9 (31.1, 36.8)        | 1585        | 52.8 (49.8, 55.8)        | 7364        | 53.5 (52.1, 54.8)        | 3254        | 43.0 (41.0, 45.0)        | 15005        | 47.4 (46.5, 48.4)        |  |
| <i>Type of Place of Residence</i> |             |                          |             |                          |             |                          |             |                          |              |                          |  |
| Urban                             | 934         | 30.0 (26.3, 34.0)        | 328         | 53.9 (50.0, 57.8)        | 2168        | 53.9 (51.3, 56.5)        | 900         | 48.4 (44.4, 52.5)        | 4330         | 47.6 (45.8, 49.5)        |  |
| Rural                             | 2145        | 39.2 (36.8, 41.6)        | 2163        | 63.1 (60.4, 65.7)        | 6480        | 59.1 (57.7, 60.5)        | 3787        | 54.1 (52.3, 55.8)        | 14575        | 55.4 (54.5, 56.4)        |  |
| <i>Mother's Education Level</i>   |             |                          |             |                          |             |                          |             |                          |              |                          |  |
| No Education                      | 359         | 47.2 (42.3, 52.3)        | 327         | 68.9 (61.8, 75.2)        | 1692        | 66.4 (63.7, 69.0)        | 463         | 61.6 (56.7, 66.3)        | 2841         | 63.5 (61.4, 65.5)        |  |
| Primary                           | 1343        | 38.1 (35.0, 41.3)        | 1480        | 64.3 (61.2, 67.4)        | 5037        | 56.9 (55.3, 58.5)        | 2441        | 54.3 (52.1, 56.4)        | 10301        | 54.9 (53.8, 56.0)        |  |
| Secondary or Higher               | 859         | 32.8 (28.7, 37.2)        | 367         | 52.7 (47.3, 58.1)        | 968         | 54.4 (50.6, 58.2)        | 1062        | 49.6 (45.9, 53.4)        | 3256         | 47 (44.8, 49.1)          |  |
| Unknown                           | 518         | 30.3 (26.0, 34.9)        | 317         | 53.6 (46.7, 60.3)        | 951         | 50.7 (46.9, 54.5)        | 721         | 48.1 (43.9, 52.3)        | 2507         | 46.1 (43.8, 48.4)        |  |
| <i>Gender of Household Head</i>   |             |                          |             |                          |             |                          |             |                          |              |                          |  |
| Male                              | 2100        | 36.5 (34.1, 39.0)        | 1921        | 61.0 (58.3, 63.6)        | 7020        | 57.8 (56.5, 59.2)        | 3373        | 53.1 (51.2, 55.1)        | 14414        | 54.0 (53.1, 55.0)        |  |
| Female                            | 979         | 36.1 (32.4, 40.0)        | 570         | 64.8 (59.8, 69.6)        | 1628        | 57.5 (54.2, 60.8)        | 1314        | 52.6 (49.5, 55.6)        | 4491         | 52.4 (50.6, 54.2)        |  |
| <i>Type of Toilet Facility</i>    |             |                          |             |                          |             |                          |             |                          |              |                          |  |
| No Toilet Facility                | 487         | 49.3 (44.8, 53.8)        | 169         | 68.9 (58.8, 77.4)        | 1118        | 70.1 (66.9, 73.0)        | 375         | 66.9 (61.9, 71.5)        | 2149         | 64.7 (62.4, 66.9)        |  |
| PIT Latrine                       | 2325        | 35.0 (32.7, 37.3)        | 2279        | 62.0 (59.5, 64.4)        | 6480        | 56.9 (55.5, 58.3)        | 4196        | 52.0 (50.2, 53.7)        | 15280        | 53.0 (52.0, 53.9)        |  |
| Flush Toilet                      | 266         | 25.0 (17.5, 34.3)        | 43          | 29.7 (20.7, 40.6)        | 1022        | 50.7 (46.8, 54.5)        | 97          | 42.1 (30.0, 55.1)        | 1428         | 44.6 (41.3, 48.0)        |  |
| Other                             | 2           | 50.0 (5.9, 94.1)         | 0           | 0                        | 28          | 43.5 (26.2, 62.6)        | 18          | 61.3 (35.7, 81.9)        | 48           | 49.9 (35.1, 64.7)        |  |
| <b>Total</b>                      | <b>3079</b> | <b>36.4 (34.3, 38.5)</b> | <b>2491</b> | <b>61.9 (59.5, 64.2)</b> | <b>8648</b> | <b>57.8 (56.6, 59.0)</b> | <b>4687</b> | <b>53.0 (51.3, 54.6)</b> | <b>18905</b> | <b>53.7 (52.8, 54.5)</b> |  |
